# Supplementary material for: Feeding ecology of the Terciopelo pit viper snake (Bothrops asper) in Ecuador
Source: PeerJ journal article supplement (doi:10.7717/peerj.14817), 2023-02-08

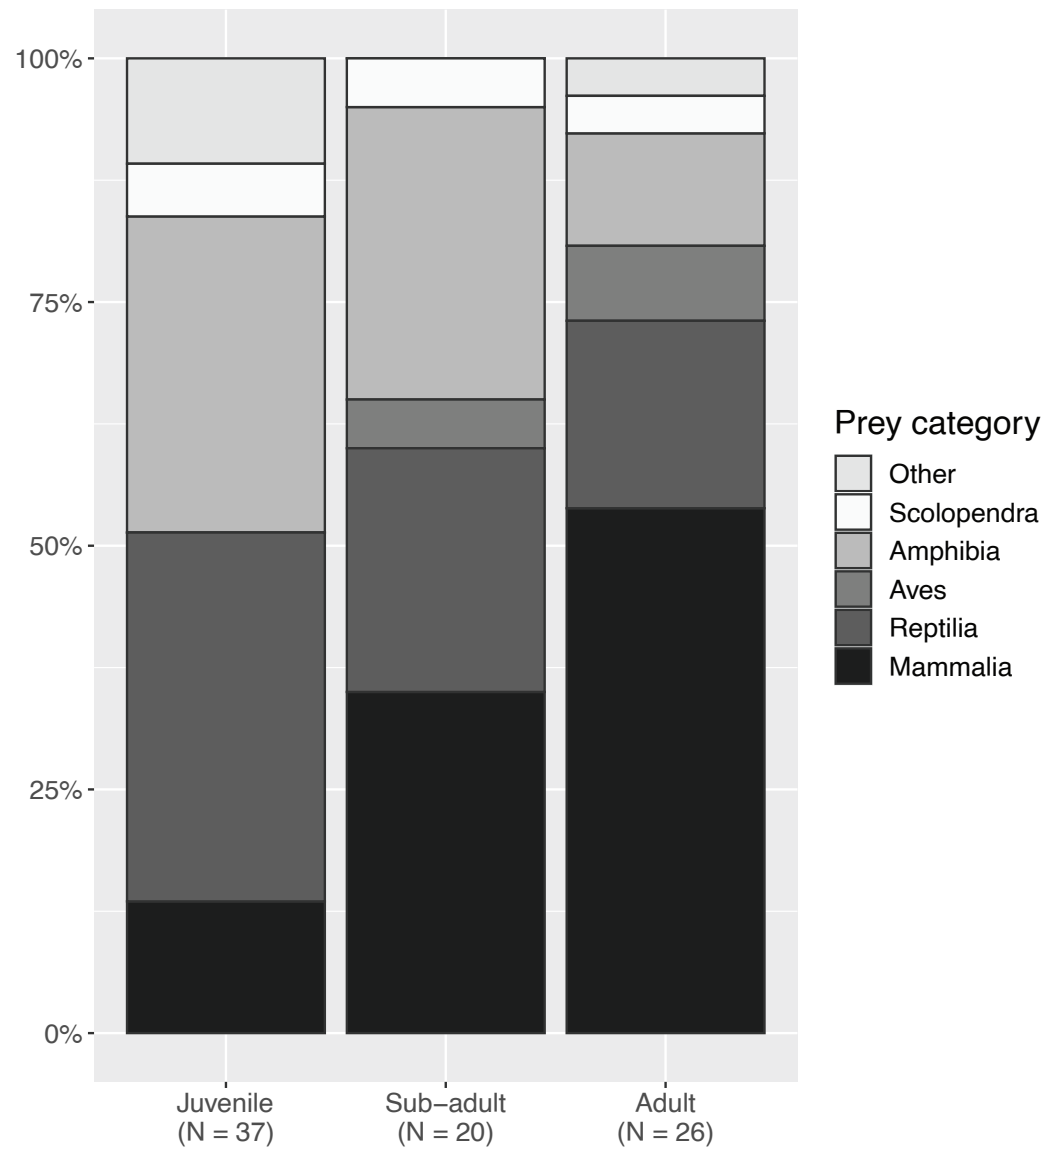

Supplement: FigS2.pdf [file FigS2.pdf]
