# Supplementary material for: Feeding ecology of the Terciopelo pit viper snake (Bothrops asper) in Ecuador
Source: PeerJ. 2023 Feb 8;11:e14817. doi: 10.7717/peerj.14817 (PMC9921990; doi:10.7717/peerj.14817)
Supplement: Supplemental Information 10 [file peerj-11-14817-s010.xlsx]

## Sheet: Hoja1
Museum #	Sex	Class size	Total length	SVL en mm	Tail length	minimal diameter of snake (neck) in mm	body mass of snake withOUT prey in grams	ID prey	Class	Mass of prey	Length of prey	Diameter of prey	Direction of ingestion	# of prey	Clasif conservation of prey
MUTPL-45	F	J	319	272	47	6.1	11	Medopheos edracanthus	lagartija	8	95	11.7	head	Presa 1	Completa
MUTPL-45	F	J	319	272	47	6.1	11	Squamata	lagartija	2				Presa 2	Residuos
MUTPL-205	F	S	789	685	104	10.3	139.9	Mammalia	mamifero	1.6				Presa 1	Residuos
MUTPL-228	F	A	1148	983	165	14.3	515	Mammalia	mamifero	34.2			head	Presa 1	Residuos
MUTPL-229	F	A	1246	1061	185	19.2	556.8	Mammalia	mamifero	17.5				Presa 1	Residuos
QCAR-5053	F	J	381	338	43	6.76	14.7	Leptodactylus ventrimaculatus	anfibio	6.6	111	16.27	head	Presa 1	Incompleta
QCAZR-5053	F	J	381	338	43	6.76	14.7	Cricetidae	mamifero	0.5				Presa 2	Residuos
QCAZR-5657	F	J		316		6.1	16.7	Pristimantis sp.	anfibio	0.2				Presa 1	Incompleta
QCAZR-5657	F	J		316		6.1	16.7	Anura	anfibio	0.1				Presa 2	C.E. Secundario
QCAZR-5760	M	S	726	632	94	7.63	53.38	Scolopendromorpha	escolopendra	7.72	117	13.18	tail	Presa 1	Completa
QCAZR-5760	M	S	726	632	94	7.63	53.38	Scolopendromorpha	escolopendra					Presa 2	Residuos
QCAZR-5764	F	S	683	608	75	7.92	66.8	Cricetidae: Oligoryzomys	mamifero	26.3	146	25.9	head	Presa 1	Completa
QCAZR-5766	F	S	676	586	90	8.89	77.7	Cricetidae: Transandinomys	mamifero	35.6	17.1	29.1	head	Presa 1	Completa
QCAZR-5766	F	S	676	586	90	8.89	77.7	Cricetidae	mamifero	1.1				Presa 2	Residuos
QCAZR-5766	F	S	676	586	90	8.89	77.7	Scolopendromorpha	escolopendra	0.9				Presa 2	Residuos
QCAZR-5768	M	S	722	616	106	9.22	95	Cricetidae: Transandinomys	mamifero	6.2	97	15.61	head	Presa 1	Completa
QCAZR-5768	M	S	722	616	106	9.22	95	Cricetidae: Transandinomys	mamifero	5.1				Presa 2	Incompleta
QCAZR-5856	M	J	464	400	64	6.08	28.6	Cricetidae: Handleyomys	mamifero	5.3			head	Presa 1	Incompleta
QCAZR-5858	F	A	1485	1314	171	19.15	915.3	Echimydae: Proechimys semiespinosus	mamifero	56.4	425		head	Presa 1	Incompleta
QCAZR-5862	F	S	941	821	120	12.61	235.5	Cricetidae	mamifero	6.7				Presa 1	Residuos
QCAZR-5871	M	J	423	365	58	5.78	21.3	Pristimantis sp.	anfibio	1.3			head	Presa 1	Incompleta
QCAZR-5871	M	J	423	365	58	5.78	21.3	Anura	anfibio	0.01				Presa 2	C.E. Secundario
QCAZR-5876	M	J	306	269	37	5.41	7.35	Leptodactylus ventrimaculatus	anfibio	0.8	15.05	4.14	head	Presa 1	Completa
QCAZR-5876	M	J	306	269	37	5.41	7.35	Anura	anfibio	0.8	13.34	3.83		Presa 2	Incompleta
QCAZR-5876	M	J	306	269	37	5.41	7.35	Anura	anfibio					Presa 3	C.E. Secundario
QCAZR-5877	F	S		847		10.31	226.45	Cricetidae: Nephelomys moerex	mamifero	3.52	94	11.26	head	Presa 1	Incompleta
QCAZR-5877	F	S		847		10.31	226.45	Cricetidae	mamifero	0.83				Presa 2	Residuos
QCAZR-5879	F	J	502	441	61	10	27.03	Cricetidae: Nephelomys moerex	mamifero	42.65	166	25.83	head	Presa 1	Completa
QCAZR-6435	M	S	684	585	99	9.66	83.6	Cricetidae	mamifero	7.8	108.84	15.21	head	Presa 1	Completa
QCAZR-6435	M	S	684	585	99	9.66	83.6	Mammalia	mamifero	3.5			head	Presa 2	Residuos
QCAZR-6998	M	S	636	541	95	8.1	69.8	Leptodactylus ventrimaculatus	anfibio	3.9	100	12.5	head	Presa 1	Completa
QCAZR-6998	M	S	636	541	95	8.1	69.8	Cricetidae: Handleyomys	mamifero					Presa 2	Residuos
QCAZR-9126	M	S	932	791	141	9.05	273.6	Cricetidae	mamifero	7.6				Presa 1	Residuos
QCAZR-9468	M	J	424	363	61	6.11	18.1	Scolopendromorpha	escolopendra	0.2				Presa 1	Residuos
QCAZR-11284	F	S	734	641	93	11.36	115.9	Cricetidae: Melanomys	mamifero	0.9				Presa 1	Residuos
QCAZR-11613	F	A	1447	1280	167	19.64	796	Cricetidae	mamifero	14.7	145		head	Presa 1	Incompleta
QCAZR-11613	F	A	1447	1280	167	19.64	796	Cricetidae	mamifero	16.1				Presa 2	Incompleta
QCAZR-11614	M	A	1290	1118	172	15.76	663	Cricetidae	mamifero	8.3				Presa 1	Residuos
QCAZR-11617	M	S	786	676	110	8.03	71.1	Cricetidae: Melanomys	mamifero	30.5	149	24.49	head	Presa 1	Completa
QCAZR-11617	M	S	786	676	110	8.03	71.1	Cricetidae	mamifero	0.8				Presa 2	Residuos
QCAZR-11627	F	A	1455	1280	175	24.76	1414.5	Echimydae: Proechimys sp.	mamifero	5.5				Presa 1	Residuos
QCAZR-12449	M	A	1086	935	151	14.64	437	Cricetidae	mamifero	4			head	Presa 1	Residuos
QCAZR-12460	F	A	1304	1145	159	19.18	854.5	Echimydae: Proechimys semiespinosus	mamifero	18.5			head	Presa 1	Incompleta
QCAZR-12463	F	J	557	491	66	7.5	37.6	Anolis bitectus	lagartija	1.9	75	10.91	head	Presa 1	Completa
QCAZR-12463	F	J	557	491	66	7.5	37.6	Scolopendromorpha	escolopendra	2.5	58.52	12.89	head	Presa 2	Completa
QCAZR-12463	F	J	557	491	66	7.5	37.6	Scolopendromorpha	escolopendra	0.6				Presa 3	Residuos
QCAZR-12499	M	J	495	432	63	5.84	22.5	Pristimantis achatinus	anfibio	5.2	99.78	15.55	head	Presa 1	Completa
QCAZR-12567	M	J	375	323	52	6.25	17.4	Anura	anfibio	0.1				Presa 1	Residuos
QCAZR-12570	F	A	1555	1378	177	21.52	1099.8	Cricetidae	mamifero	11.9				Presa 1	Residuos
QCAZR-12574	M	S	787	682	105	9.1	115.1	Cricetidae: Oligoryzomys	mamifero	4.4	73.29	13.16	head	Presa 1	Completa
QCAZR-12574	M	S	787	682	105	9.1	115.1	Mammalia	mamifero	6.2				Presa 2	Residuos
QCAZR-12576	M	A	1363	1195	168	16.32	695.4	Cricetidae: Oligoryzomys	mamifero	5.5				Presa 1	Residuos
QCAZR-12576	M	A	1363	1195	168	16.32	695.4	Cricetidae	mamifero	22.1				Presa 2	Residuos
QCAZR-12580	F	A		1264		24.32	1251.99	Cricetidae	mamifero	11.01				Presa 1	Residuos
QCAZR-12581	F	A	1283	1106	177	19.92	688.1	Cricetidae	mamifero	1.9				Presa 1	Residuos
QCAZR-12589	M	S	619	528	91	8.08	48.1	Didelphidae: Marmosops	mamifero	12.7	122.2	19.14	head	Presa 1	Completa
QCAZR-12590	F	J	557	495	62	8.42	41.5	Echimydae: Proechimys sp.	mamifero	10.8	113.04	15.59	head	Presa 1	Completa
QCAZR-12590	F	J	557	495	62	8.42	41.5	Cricetidae	mamifero	3.2				Presa 2	Residuos
QCAZR-12613	F	J	562	490	72	7.33	49.46	Cricetidae: Melanomys	mamifero	20.54	127.65	24.45	head	Presa 1	Completa
QCAZR-12613	F	J	562	490	72	7.33	49.46	Cricetidae	mamifero	1.18			head	Presa 2	Residuos
QCAZR-12614	F	S	948	831	117	12.12	262.05	Cricetidae: Microryzomys	mamifero	21.5	130	20.23	head	Presa 1	Completa
QCAZR-12614	F	S	948	831	117	12.12	262.05	Cricetidae: Thomasomys	mamifero	5.02				Presa 2	Residuos
QCAZR-12615	F	S	871	760	111	12.74	213.63	Cricetidae: Microryzomys	mamifero	17.73	109.31	23.43	head	Presa 1	Completa
QCAZR-12615	F	S	871	760	111	12.74	213.63	Cricetidae	mamifero	7.1				Presa 2	Residuos
QCAZR-12785	F	A	1724	1516	208	24.05	1578.2	Cricetidae: Sigmodon peruanus	mamifero	78.3	210		head	Presa 1	Incompleta
QCAZR-12785	F	A	1724	1516	208	24.05	1578.2	Cricetidae	mamifero	9.5				Presa 2	Residuos
QCAZR-13135	F	A	1425	1275	150	21.6	762.2	Cricetidae: Oligoryzomys	mamifero	6.8				Presa 1	Residuos
QCAZR-13135	F	A	1425	1275	150	21.6	762.2	Mammalia	mamifero					Presa 2	Residuos
QCAZR-13136	F	J	382	332	50	5.8	17.5	Cricetidae	mamifero	0.7				Presa 1	Residuos
